# Supplementary material for: Sequential click synthesis of hyperbranched polymers via the A2 + CB2 approach
Source: Royal Society of Chemistry journal article supplement (doi:10.1039/c1py00235j), 2011-01-01
Supplement: c1py00235j.pdf [file c1py00235j.pdf]

## Supporting Information for

### Sequential Click Synthesis of Hyperbranched Polymers via $A_2 + CB_2$ Approach

Jin Han, Bo Zhao, Yanqin Gao, Aijin Tang, and Chao Gao\*

*MOE Key Laboratory of Macromolecular Synthesis and Functionalization, Department of Polymer Science and Engineering, Zhejiang University, Hangzhou 310027, P. R. China*

E-mail: [chaogao@zju.edu.cn](mailto:chaogao@zju.edu.cn) (C.G.)

## EXPERIMENT

### Materials

1,6-Hexanedithiol and 3,6-dioxaoctane-1,8-dithiol were purchased from TCI. Propargyl acrylate, propargyl methacrylate, 2,2-dimethoxy-2-phenyl-acetophenone (DMPA), 2,2-azobisisobutyronitrile (AIBN) and toluene (HPLC grade) were purchased from Aldrich. THF, ethyl acetate, *n*-propylthiol and Et<sub>3</sub>N were obtained from Sinopharm Chemical Reagent Co. Ltd. Propargyl acrylate and propargyl methacrylate were distilled under reduced pressure before use. All reagents were used as received.

### Measurement and Techniques

#### *Nuclear Magnetic Resonance Spectroscopy (NMR)*

The <sup>1</sup>H NMR measurements were carried out on a Varian Mercury Plus 300 MHz NMR spectrometer at 20 °C. The <sup>13</sup>C NMR measurements were performed on a Bruker DMX 500MHz NMR spectrometer at 20 °C. The samples were dissolved with CDCl<sub>3</sub> and the solutions were measured with tetramethylsilane (TMS) as an internal reference.

#### *Gel Permeation Chromatography (GPC)*

The molecular weights of polymers were measured on a PL PL-GPC220, using linear polystyrene as calibration, and THF as the eluent at a flow rate of 1 mL/min.

#### *High Performance Liquid Chromatography (HPLC)*

The HPLC measurement was carried out on a Shimadzu LCMS-2020 with a  $\lambda = 254$  nm UV detector and CH<sub>3</sub>OH as the eluent at a flow rate of 1 mL/min.

#### *Mass Spectrometry (MS)*

The MS analysis was carried out on a Thermo Finnigan Polaris Q quadrupole ion trap mass-spectrometer, employing electron impact ionisation. The sample in THF solution was passed through Gas Chromatography System before the MS analysis.

### Synthesis of the Models, **Ter**, **Den**, **Mix<sub>1</sub>** and **Mix<sub>2</sub>**

Compound **Ter** was prepared via thiol-ene addition between *n*-propylthiol and propargyl acrylate. Experimentally, *n*-propylthiol (1.83 g, 24 mmol) and propargyl acrylate (2.20 g, 20 mmol) was dissolved in ethyl acetate (8 mL) in a 50 mL flask. This solution was purged with N<sub>2</sub> for 15 min to eliminate oxygen, and then was added dropwise with Et<sub>3</sub>N (4.05 g, 40 mmol) under vigorous stirring. After the reaction system was kept at 30 °C for 5 h, volatiles such as ethyl acetate, Et<sub>3</sub>N and excess *n*-propylthiol were removed under reduced pressure, affording the compound **Ter** (3.58 g, 19.2 mmol) with a yield of 96.1%. <sup>1</sup>H NMR (300 MHz, CDCl<sub>3</sub>): 4.70 (d, 2H, CH≡CCH<sub>2</sub>O), 2.84-2.58 (m, 4H, OCCH<sub>2</sub>CH<sub>2</sub>S), 2.51 (t, 2H, CH<sub>3</sub>CH<sub>2</sub>CH<sub>2</sub>S), 2.50 (t, 1H, CH≡CCH<sub>2</sub>O), 1.60 (m, 2H, CH<sub>3</sub>CH<sub>2</sub>CH<sub>2</sub>S), 0.98 (t, 3H, CH<sub>3</sub>CH<sub>2</sub>CH<sub>2</sub>S).

Compound **Den** was formed by bisaddition of **Ter** with *n*-propylthiol via thiol-yne reaction. Experimentally, **Ter** (1.0 g, 5.4 mmol), *n*-propylthiol (1.07 g, 14.04 mmol), 2,2-dimethoxy-2-phenyl-acetophenone (51 mg, 0.2 mmol), and toluene (3 mL) were mixed in a 25 mL flask. After purged with N<sub>2</sub> for 15 min, the flask was irradiated under a UV lamp (λ = 365 nm) for 10 h. The resulting product **Den** (1.80 g, 5.3 mmol) was obtained via *vacuo* evaporation of all the volatiles with the yield of 98.7%. <sup>1</sup>H NMR (300 MHz, CDCl<sub>3</sub>): 4.4-4.2 (m, 2H, CH<sub>2</sub>OOC), 3.0 (m, 1H, CH), 2.8-2.4 (12H, CH<sub>3</sub>CH<sub>2</sub>CH<sub>2</sub>SCH<sub>2</sub>CH<sub>2</sub>COOCH<sub>2</sub>CH(SCH<sub>2</sub>CH<sub>2</sub>CH<sub>3</sub>)CH<sub>2</sub>SCH<sub>2</sub>CH<sub>2</sub>CH<sub>3</sub>), 1.6 (m, 6H, CH<sub>3</sub>CH<sub>2</sub>CH<sub>2</sub>S), 0.98 (m, 9H, CH<sub>3</sub>CH<sub>2</sub>CH<sub>2</sub>S).

Two mixtures comprised of **Ter**, **Den** and **Lin** units, **Mix<sub>1</sub>** and **Mix<sub>2</sub>** were prepared to mimic the unit structure of HP by inadequate additions of 1.8 and 0.5 equivalent of *n*-propylthiol to **Ter**, respectively. **Ter** (1.0 g, 5.4 mmol), *n*-propylthiol (0.76 g, 9.72 mmol or 0.21 g, 2.7 mmol), 2,2-dimethoxy-2-phenyl-acetophenone (51 mg, 0.2 mmol), and toluene (3 mL) were charged to a 25 mL flask. The flask was then purged with N<sub>2</sub> and irradiated with UV light for 8 h. Toluene was evaporated and the residual was directly analyzed with <sup>1</sup>H NMR spectrum. <sup>1</sup>H NMR (300MHz, CDCl<sub>3</sub>): 6.3 and 5.6 (m, OCH<sub>2</sub>CH=CH moiety of **Lin**), 4.7 (d, CH<sub>2</sub>OOC moiety of **Ter**), 4.58 (OCH<sub>2</sub>CH=CH moiety of **Lin**), 4.4-4.2 (m, CH<sub>2</sub>OOC moiety of **Den**), 3.0 (m, CH moiety of **Den**).

### Synthesis of HP from 3,6-Dioxaoctane-1,8-dithiol

#### The whole preparation procedure can be completed within 12 h.

In a 50 mL flask, 3,6-dioxaoctane-1,8-dithiol (1.82 g, 10 mmol) and Et<sub>3</sub>N (1.01 g, 10 mmol) was dissolved in THF (4 mL). The solution was purged with N<sub>2</sub> for 10 min to eliminate oxygen and then added dropwise with a THF (2 mL) solution of propargyl methacrylate (1.24 g, 10 mmol) in 30 min with vigorous stirring. The reaction system was kept in a water bath at 35 °C and monitored with <sup>1</sup>H NMR spectroscopy. After 8 h, the proton signals of the CH<sub>2</sub>=C moiety of methacrylate totally disappeared indicating the reaction completion. Rotary evaporation and vacuum evaporation of THF and Et<sub>3</sub>N afforded the precursor (3.05 g) comprised of equal amounts of thiol and propargyl groups. <sup>1</sup>H NMR (300MHz, CDCl<sub>3</sub>): 4.70 (d, 2H, CH≡CCH<sub>2</sub>O), 3.73-

3.53 (m, 4H,  $\text{HSCH}_2\text{CH}_2\text{OCH}_2\text{CH}_2\text{OCH}_2\text{CH}_2\text{S}$ ), 2.94-2.57 (m, 7H,  $\text{HSCCH}_2\text{CH}_2\text{OCH}_2\text{CH}_2\text{OCH}_2\text{CH}_2\text{SCH}_2\text{CH}$ ), 2.49 (t, 1H,  $\text{CH}\equiv\text{C}$ ), 1.60 (m, 4H,  $\text{HSCH}_2$ ), 1.27 (d, 3H,  $\text{SCH}_2\text{CHCH}_3\text{COO}$ ).

The precursor was diluted with toluene to 0.5 M and added with AIBN (82.1 mg, 0.5 mmol) to make a stock solution. After purged with  $\text{N}_2$  for 10 min, the flasks heated at 65 °C for 3h. Then, the flasks were exposed to air, and the polymer solutions were analyzed by  $^1\text{H}$  NMR (Figure S4). The polymers collected by precipitation into methanol were characterized by GPC and have a  $M_n$  of 6300 and  $M_w$  of 19300.

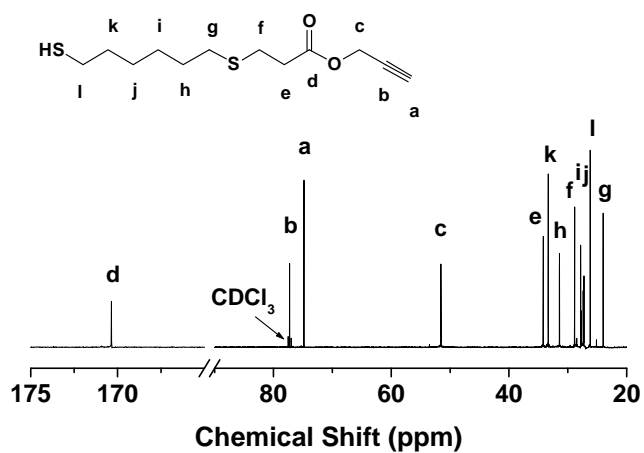

**Fig. S1**  $^{13}\text{C}$  NMR spectra of precursor prepared from 1,6-hexanedithiol and propargyl acrylate via thiol-ene click reaction. (The difference between the three components in the precursor cannot be detected by the  $^{13}\text{C}$  NMR spectroscopy, so we only show the signal assignment of AB<sub>2</sub> monomer for concision.)

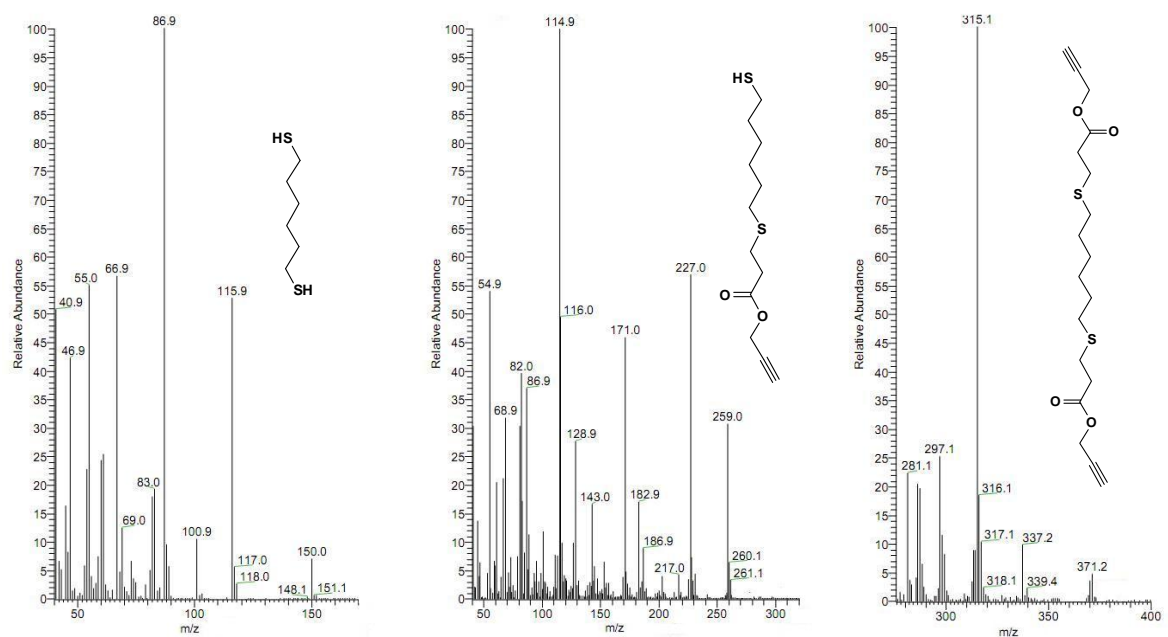

**Fig. S2** Mass spectrum of the three components, dithiols, AB<sub>2</sub> monomer and di-ynes, in the AB<sub>2</sub>-type intermediate prepared from 1,6-hexanedithiol and propargyl acrylate via thiol-ene click reaction.

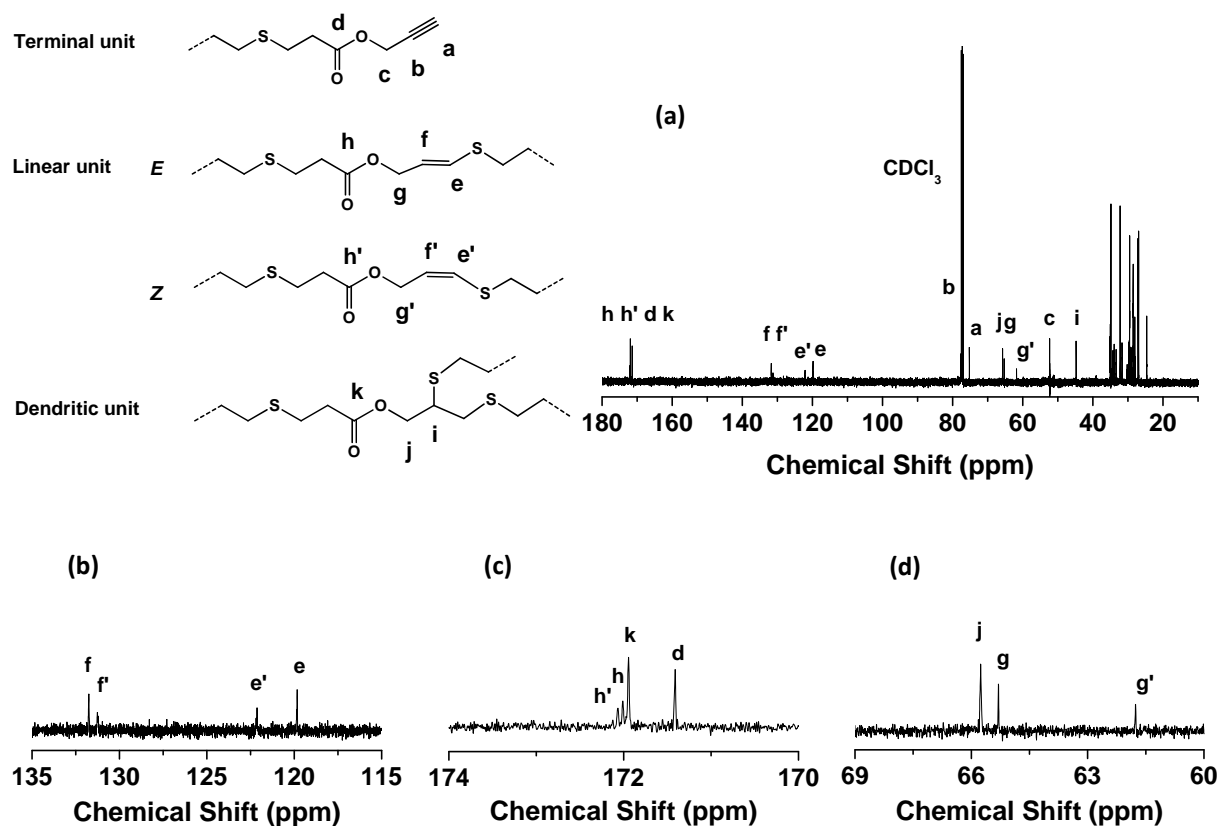

**Fig. S3** <sup>13</sup>C NMR spectra of precursor prepared from 1,6-hexanedithiol and propargyl acrylate via thiol-ene click reaction.

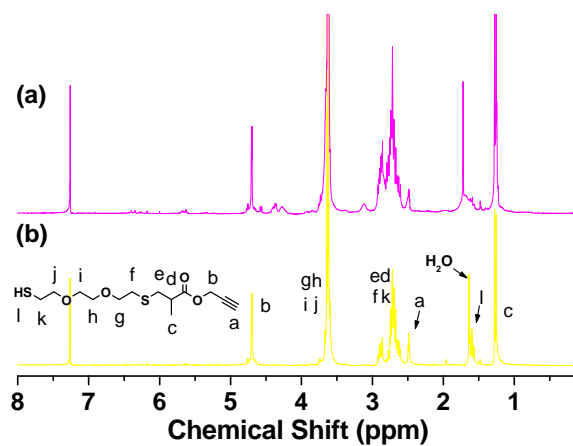

**Fig. S4**  $^1\text{H}$  NMR spectra of precursor prepared from 3,6-dioxaoctane-1,8-dithiol via thiol-ene click reaction (b) and the corresponding hyperbranched polymer (a).
